# Supplementary material
Source: PubMed Central journal article supplement (PMC6255157)
Supplement: pnas.1811269115.sapp.pdf [file pnas.1811269115.sapp.pdf]

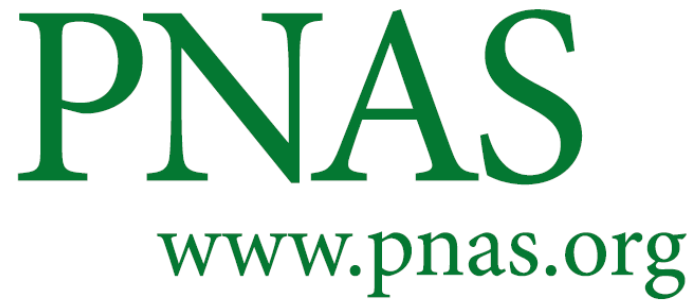

## Supplementary Information for

Decomposition responses to climate depend on microbial community composition

**Authors:** Sydney I Glassman<sup>1,2</sup>, Claudia Weihe<sup>1</sup>, Junhui Li<sup>3</sup>, Michaeline BN Albright<sup>1,4</sup>, Caitlin I Looby<sup>1,5</sup>, Adam C Martiny<sup>1,3</sup>, Kathleen K Treseder<sup>1</sup>, Steven D Allison<sup>1</sup>, Jennifer BH Martiny<sup>1</sup>

Sydney I. Glassman  
Email: [sydney.glassman@ucr.edu](mailto:sydney.glassman@ucr.edu)

### **This PDF file includes:**

Figs. S1 to S11  
Tables S1 to S10  
Supplementary Appendix Materials and Methods

**Supplementary Figures**

**Figure S1.** Soil surface temperature (°C) from two plots at each site for a year of the experiment with colors representing day (7/8am to 7/8pm) and night (7/8pm to 7/8am) temperatures. The grassland had larger day-night temperature differences between 6 and 12 months than other sites. Subalpine had the most days with freezing soil temperatures (below 0 °C), followed by Pine-Oak, then Scrubland, Grassland; Desert experienced no freezing soil temperatures.

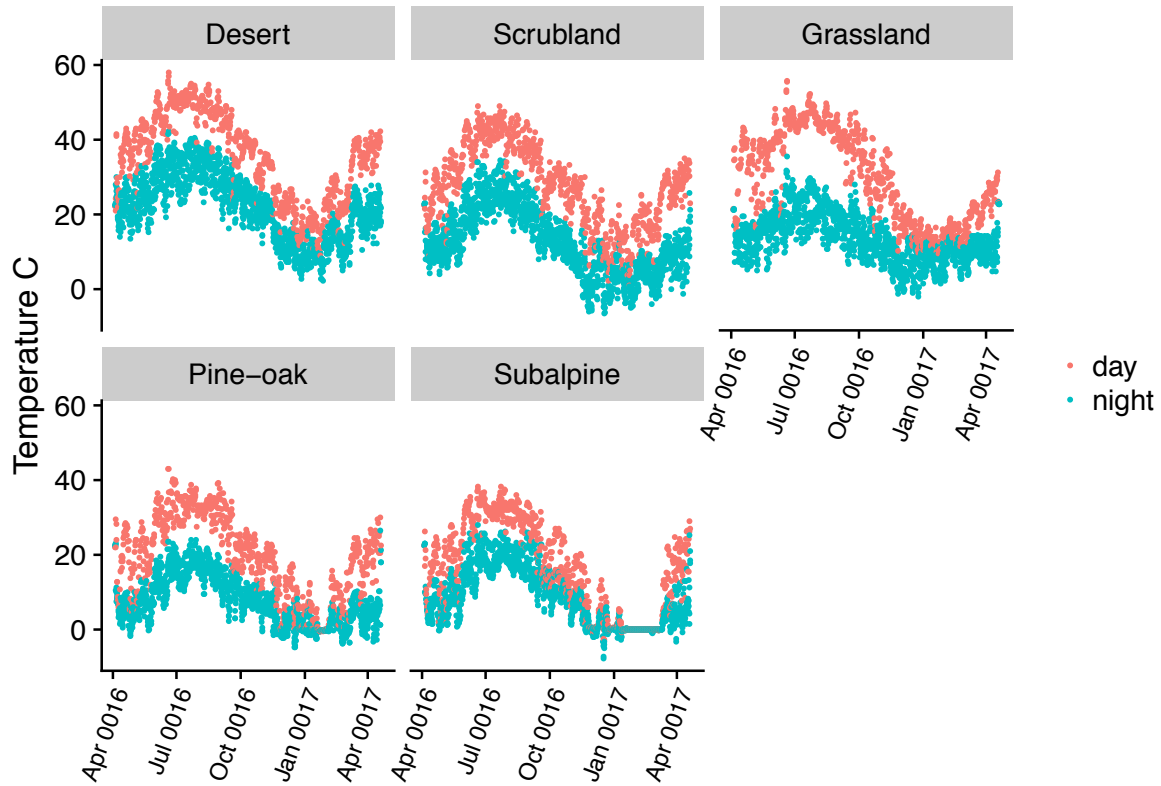

Supplementary Information

**Figure S2.** Relative abundance of families (phylum listed in legend) in the inoculum leaf litter for A) bacteria and B) fungi.

A)

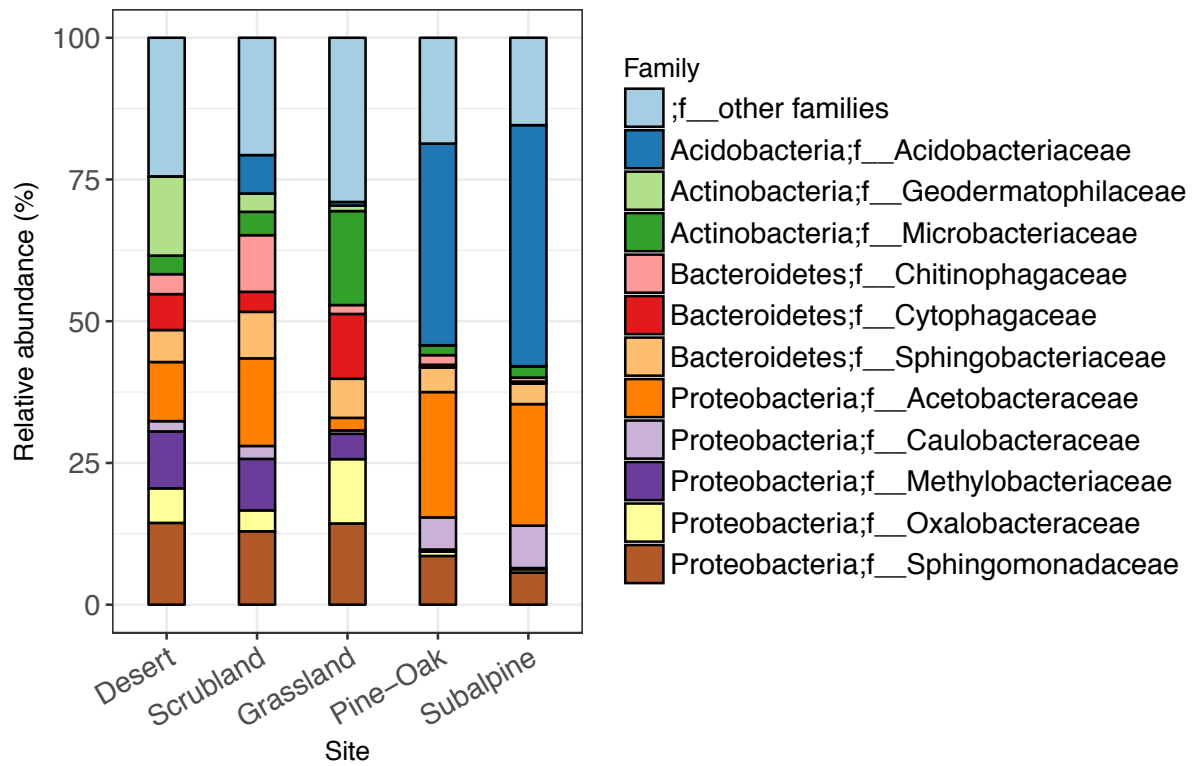

B)

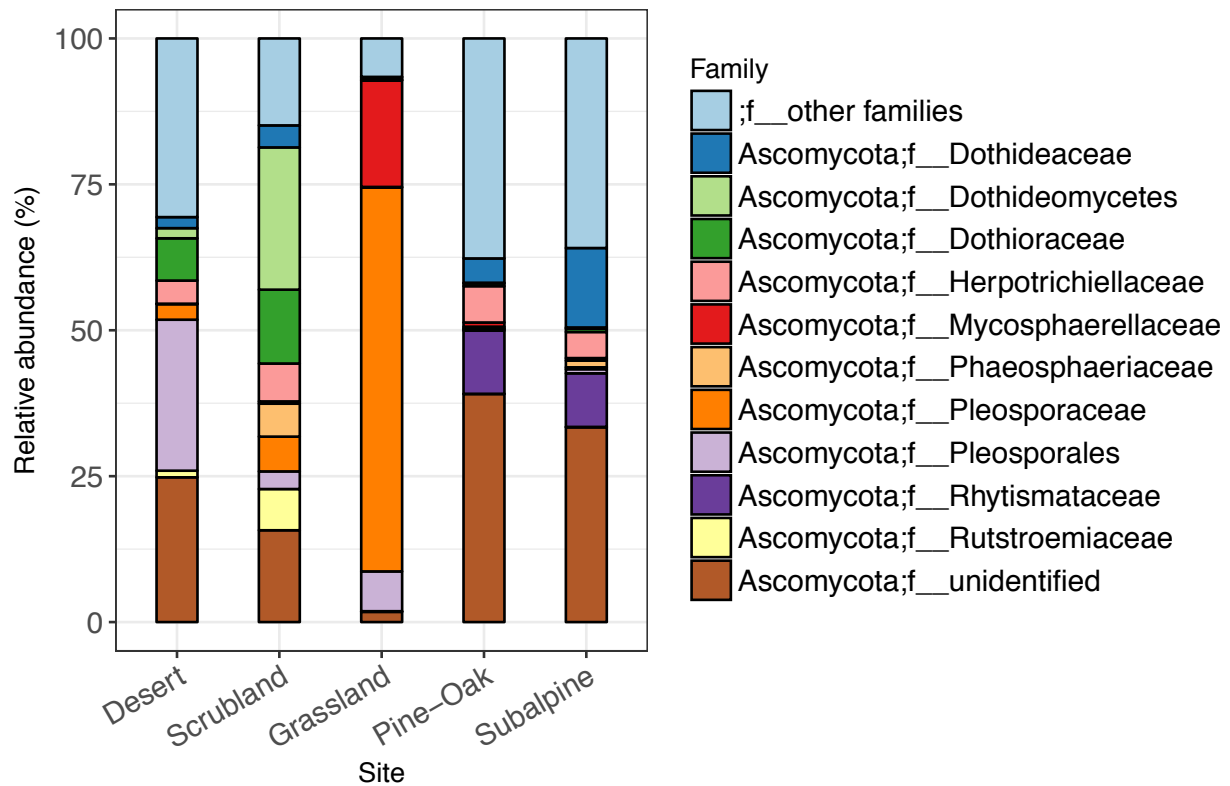

**Figure S3.** Mean OTU (97%) richness per site for bacteria and fungi in the inoculum leaf litter (after rarefying to a 10,000 sequence reads per sample). Letters indicate Tukey HSD differences.

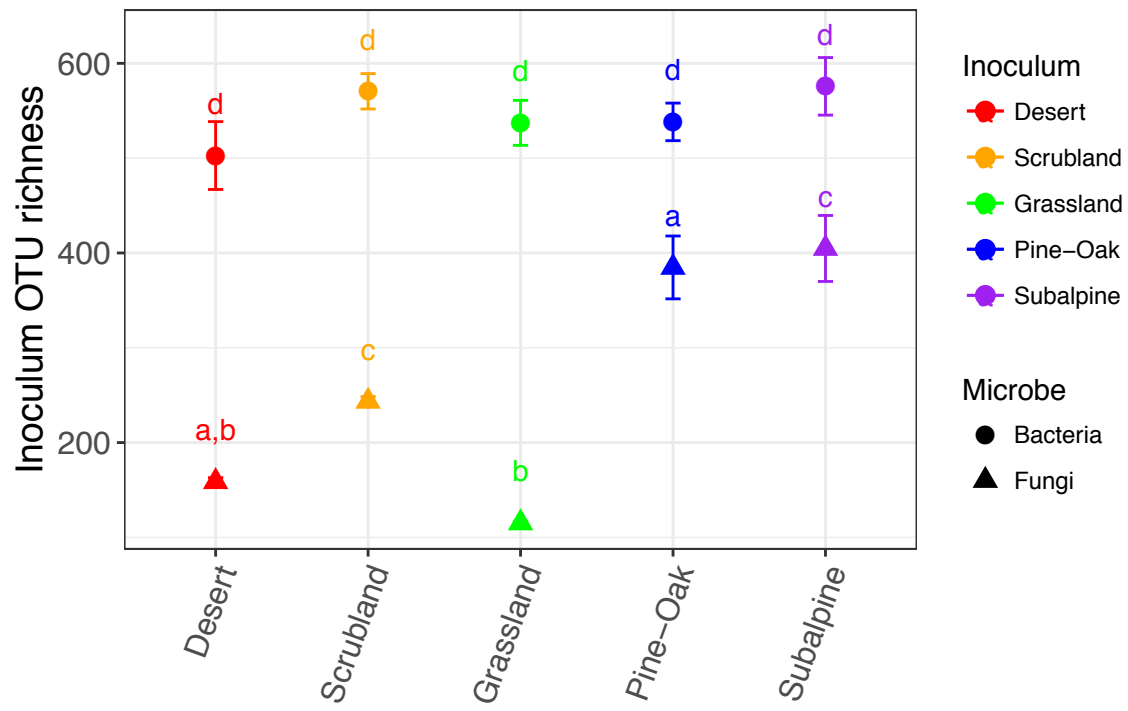

Supplementary Information

**Figure S4.** NMDS of Bray-Curtis microbial community composition for leaf litter used for Inoculum (September 2015), and survey of in-situ leaf litter adjacent to each plot at 0, 6, 12, and 18 months after inoculation for A) Bacteria and B) Fungi. Both plots have the same axis scale and legends apply to both plots. Colors represent microbial communities per site and shapes represent microbial communities per time point.

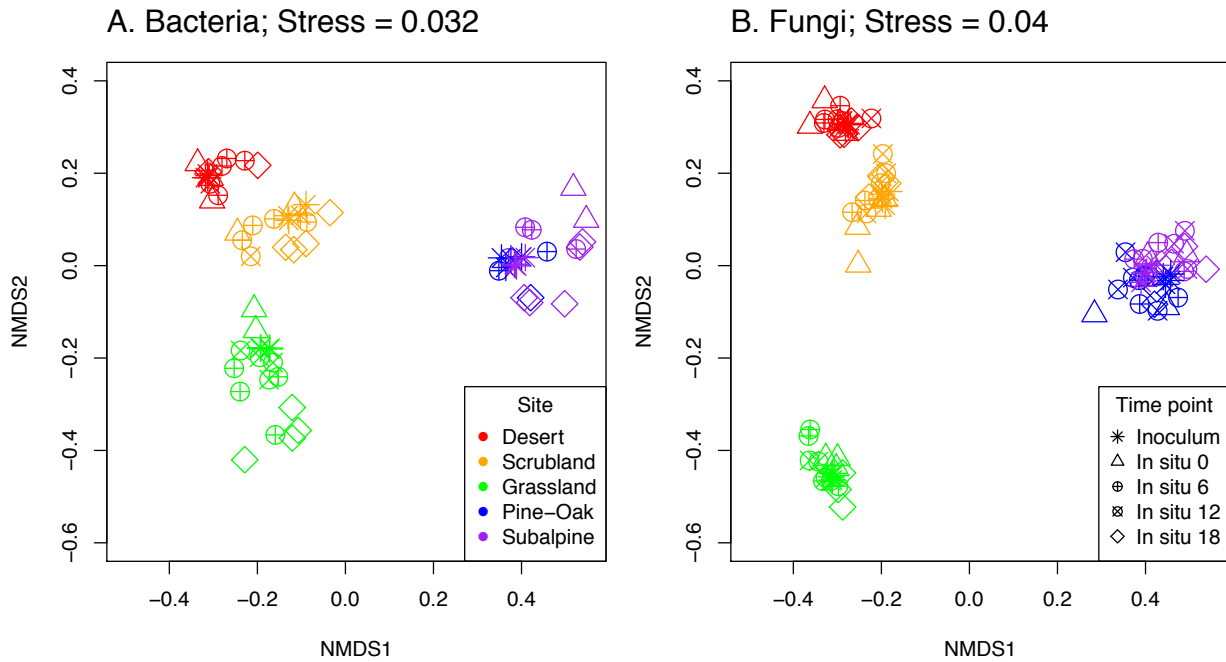

## Supplementary Information

**Figure S5.** Species accumulation curves for bacteria and fungi from the inoculum leaf litter and transplanted litterbags collected from 6, 12, and 18 months after inoculation. Points are mean number of OTUs and lines represent 95% confidence intervals.

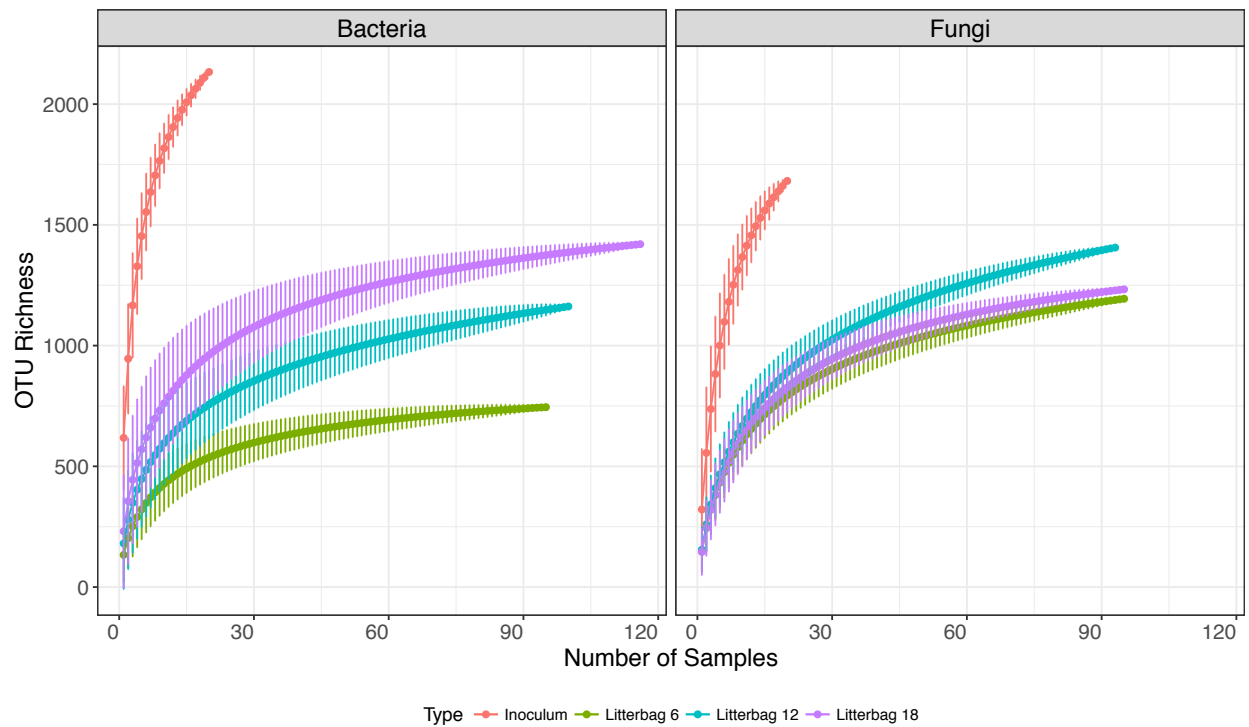

Supplementary Information

**Figure S6.** NMDS of 16S bacterial community composition for all three time points for transplant litter bags A) colored by site with shapes by inoculum and B) colored by inoculum with shapes by site. The bacterial communities are more easily differentiated when colored by site than inoculum, even though both effects are significant.

A)

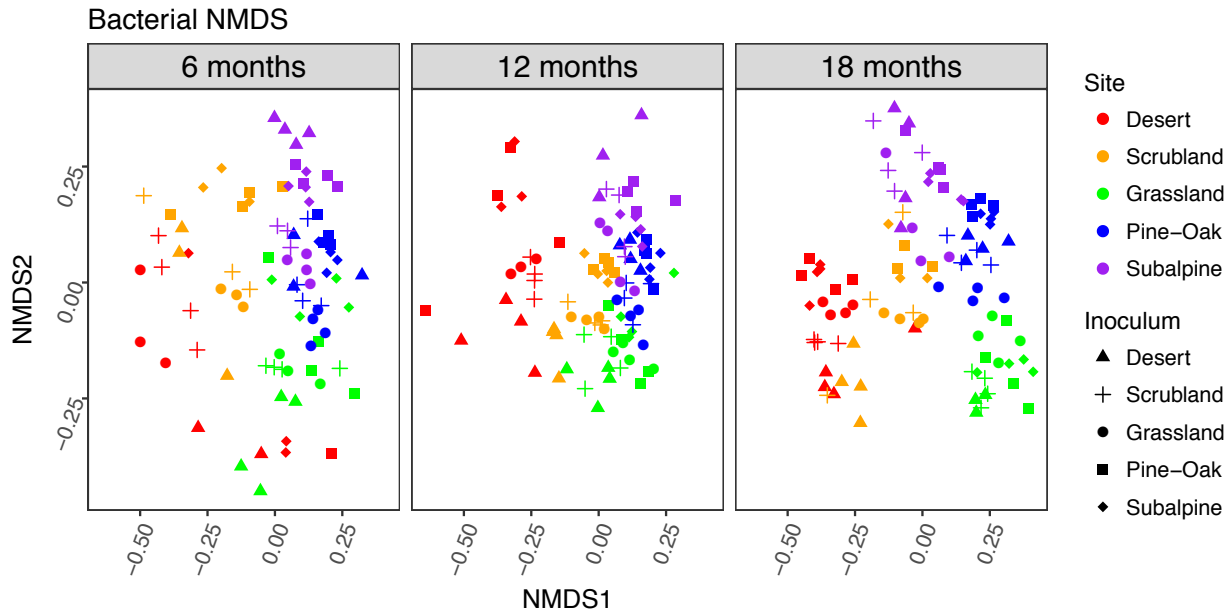

B)

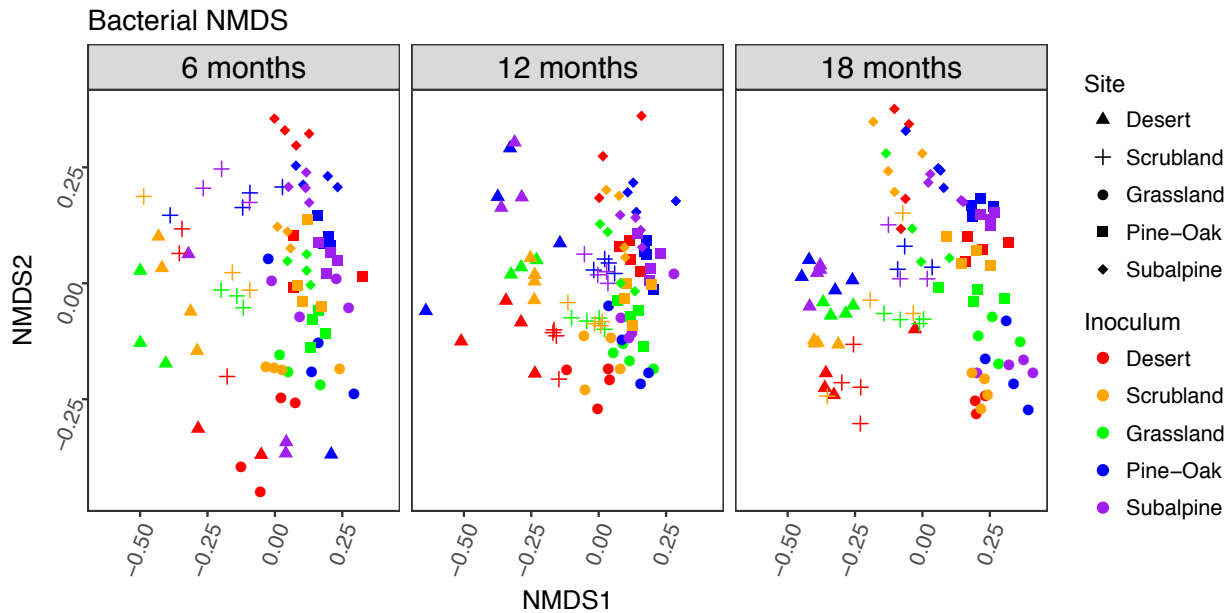

Supplementary Information

**Figure S7.** NMDS of ITS2 fungal community composition for all three time points for transplant litter bags A) colored by site with shapes by inoculum and B) colored by inoculum with shapes by site. Compared to the bacterial communities (Figure S7), the fungal communities are more easily differentiated when colored by inoculum than site, even though both effects are significant.

A)

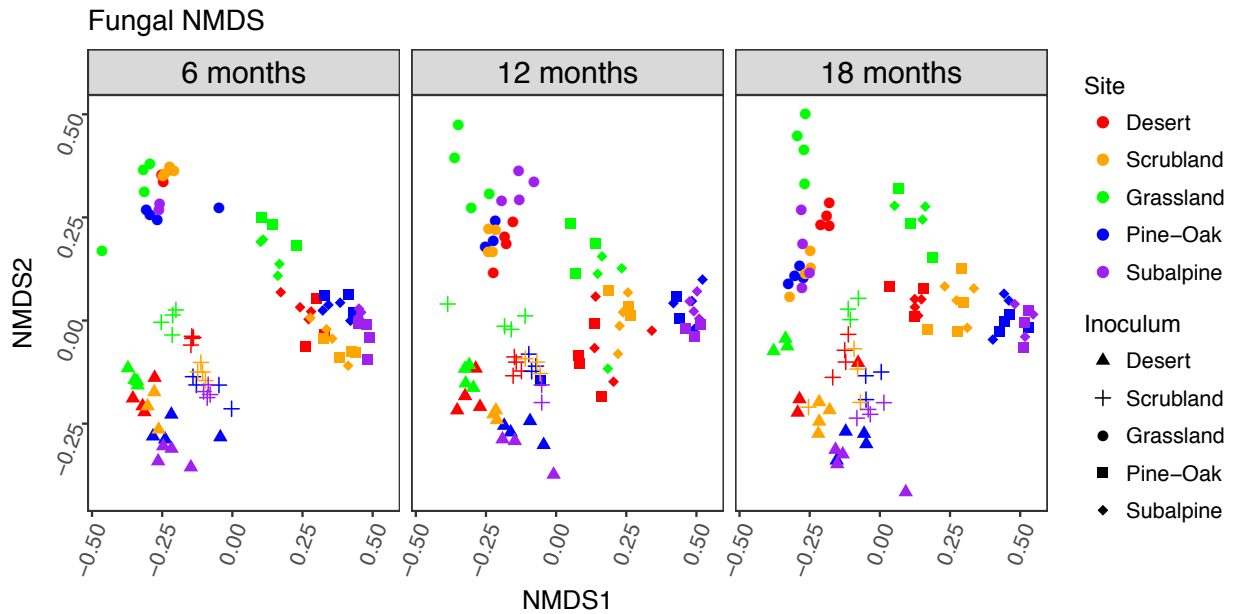

B)

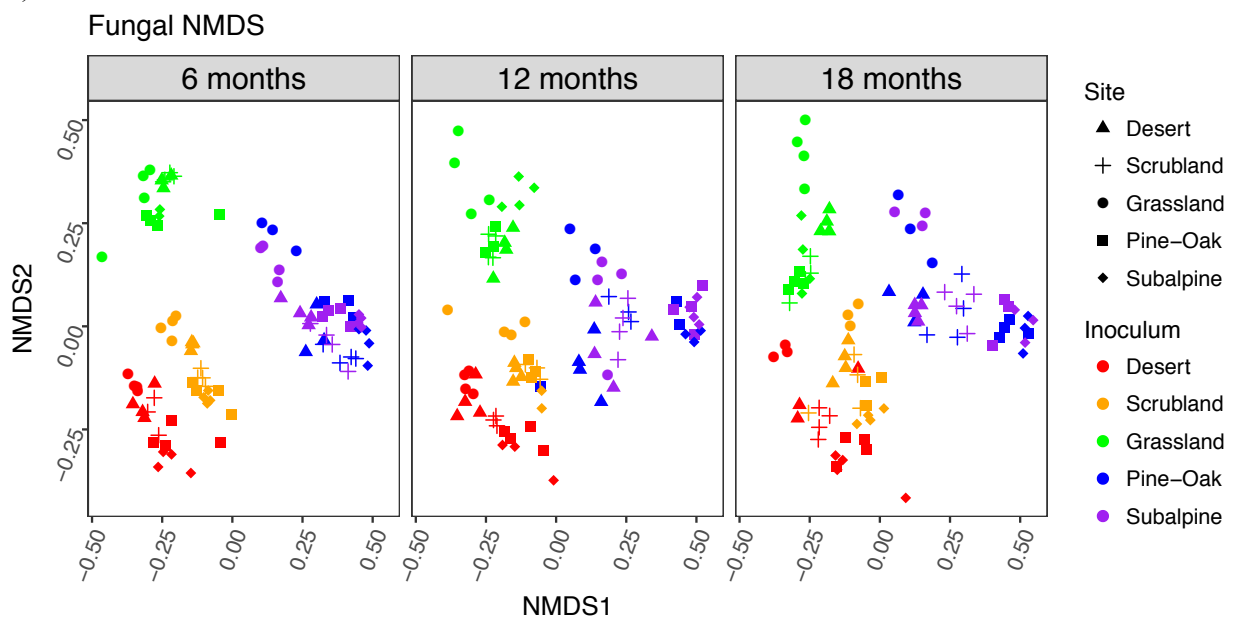



Supplementary Information

**Figure S8.** Variation in leaf litter decomposition (mean  $\pm$  standard error percent mass loss) for the three time points for the full factorial transplant experiment (5 inoculum treatments by 5 sites) against A) total precipitation (mm) at each site and B) mean soil temperature $^{\circ}$ C at each site. In addition to transplant litterbags, we included open or closed in-situ litterbags for comparison.

A)

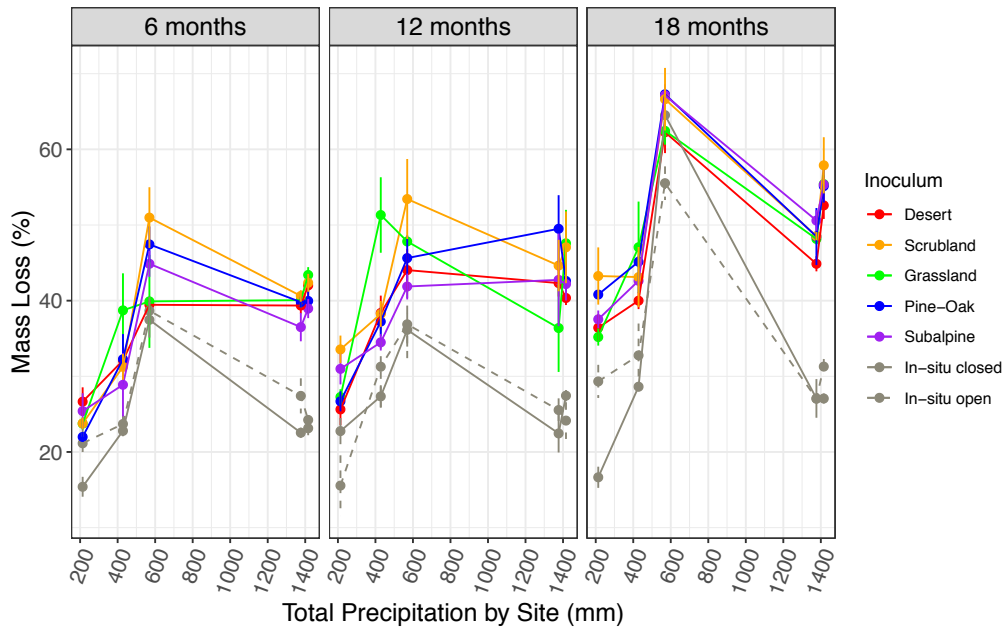

B)

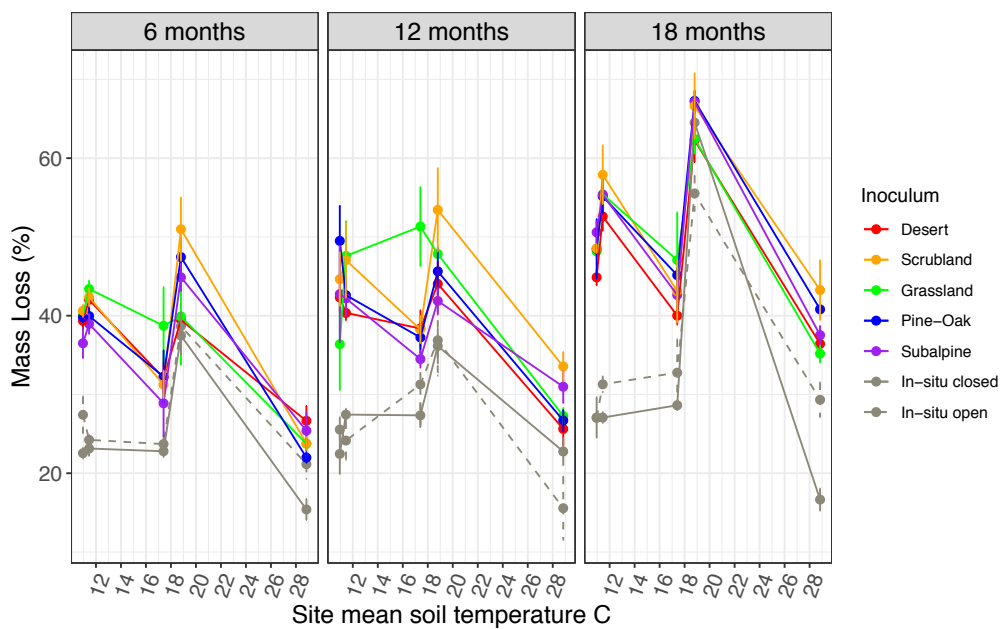

Supplementary Information

**Figure S9.** Mean  $\pm$  standard error leaf litter organic carbon proportions by inoculum for the five sites at 12 months for five non-ash organic compounds: Cellulose, Hemicellulose, Lignin, Crude Protein, Structural Carbohydrates.

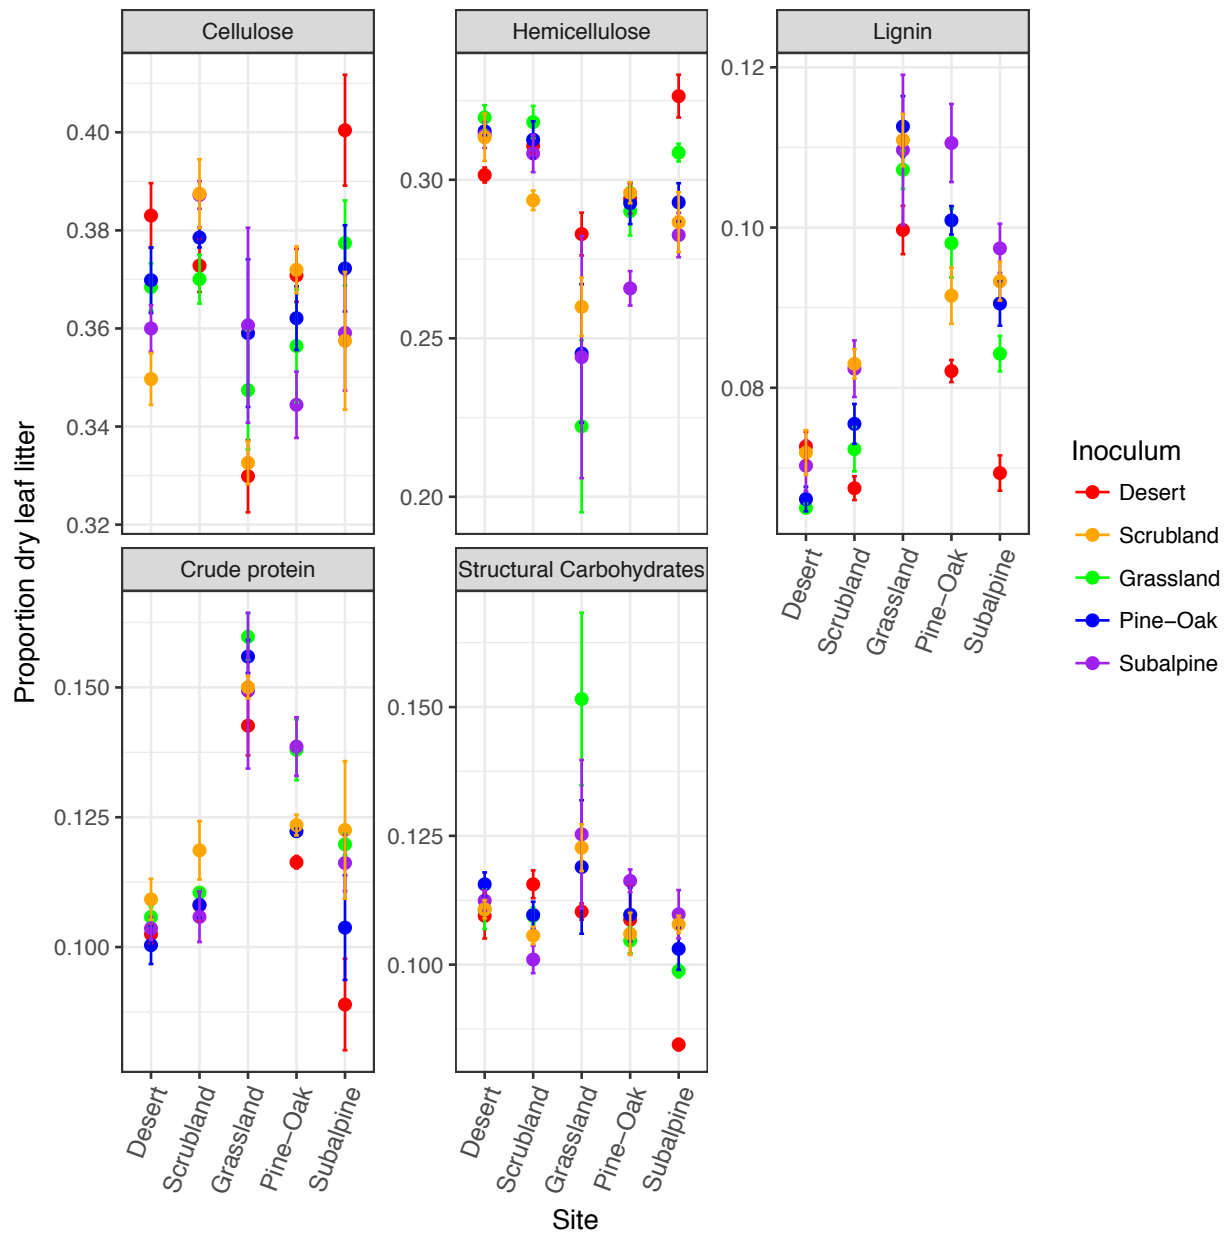

Supplementary Information

**Figure S10.** Decomposition as percent mass loss, averaged across inocula replicates at each site, at 6, 12, and 18 months, as a function of mean bacterial (cells/ g dry weight) and mean fungal (cm fungal hyphae/g dry leaf litter) abundance in the leaf litter used to inoculate litterbags from each site. Inoculum origin indicated by shapes and site indicated by colors. Statistics represent Pearson correlations of decomposition at each site against bacterial and fungal abundance in inoculum leaf litter from each site. For clarity, standard error bars not shown.

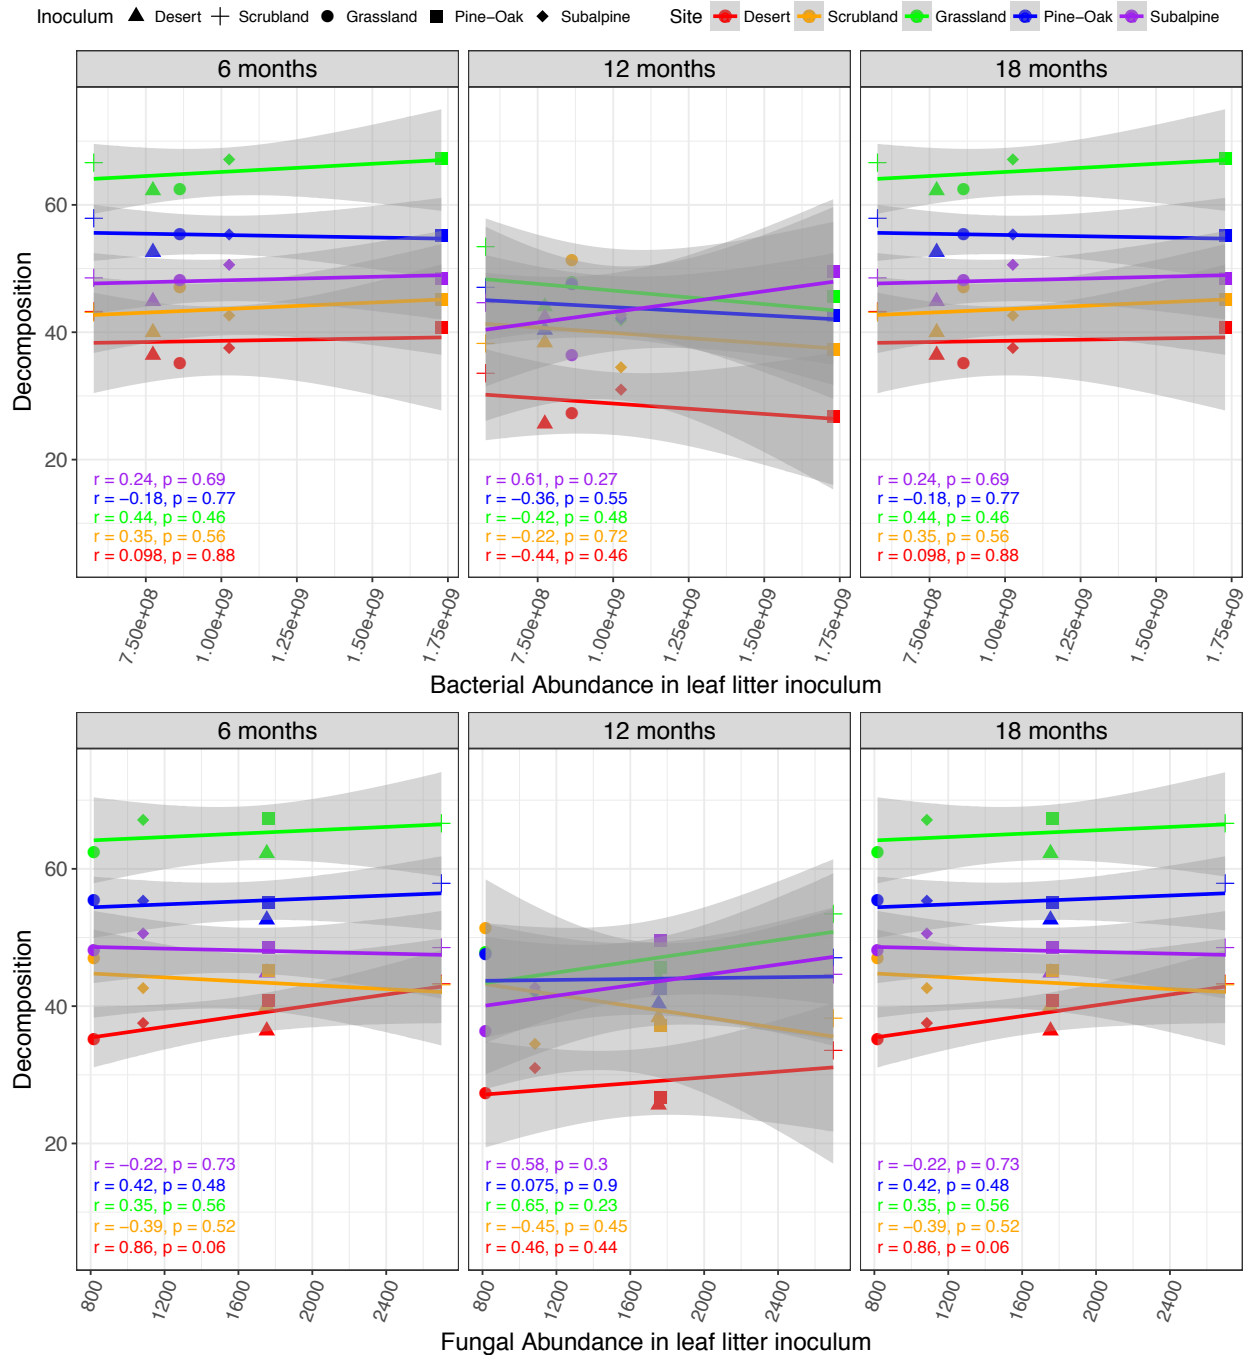

Supplementary Information

**Figure S11.** A) Differences in mean  $\pm$  standard error bacterial abundance (cells/ g dry weight) and B) mean  $\pm$  standard error fungal abundance (cm fungal hyphae/g dry leaf litter) in transplanted litterbags across the sites averaged across five inocula. Tukey HSD values for significant differences by site for each of the three time points. Mean values of in-situ closed litterbags for comparison.

A.

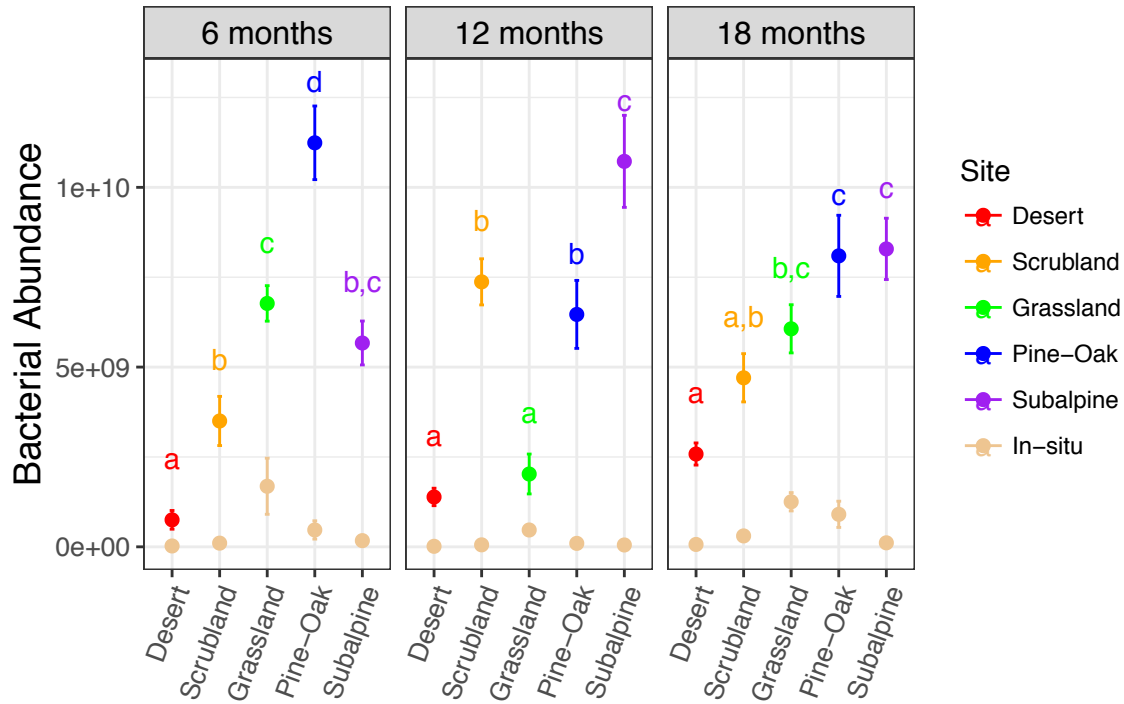

B.

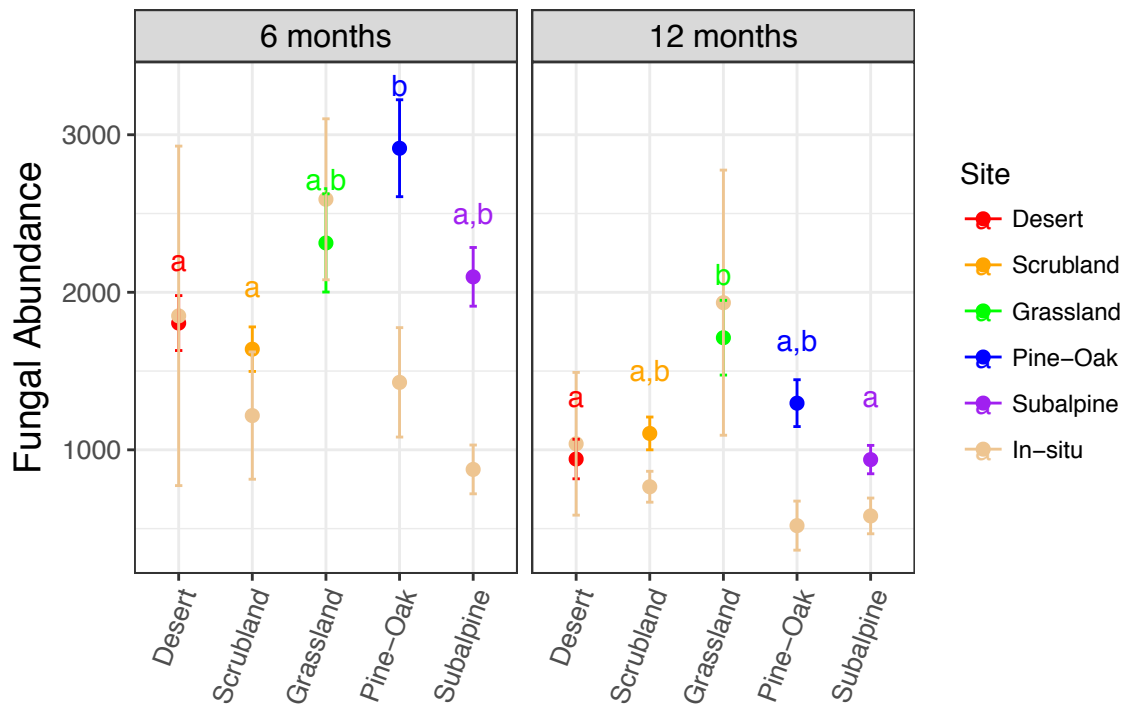

**Supplementary Tables**

**Table S1.** Description of experimental sites along elevation gradient listed in increasing precipitation order (Subalpine precipitation is underestimated due to lack of high elevation precipitation towers). GPS coordinates, Elevation (m), total precipitation (both snow and rain) in mm across the duration of the experiment (from October 1, 2015 to April 30, 2017), and mean, maximum, and minimum soil temperature (°C) (from April 2016 to April 2017).

| Site      | Latitude | Longitude | Elevation | Total Precipitation | Mean soil temperature | Max soil temperature | Min soil temperature |
|-----------|----------|-----------|-----------|---------------------|-----------------------|----------------------|----------------------|
| Desert    | 33.648   | -116.38   | 275       | 213.5               | 26.3                  | 58.0                 | 2.3                  |
| Scrubland | 33.610   | -116.45   | 1280      | 428.4               | 17.4                  | 49.0                 | -6.5                 |
| Grassland | 33.737   | -117.70   | 470       | 569.4               | 18.8                  | 55.8                 | -2.0                 |
| Pine-Oak  | 33.683   | -116.77   | 1710      | 1415.8              | 11.4                  | 43.0                 | -4.8                 |
| Subalpine | 33.823   | -116.75   | 2250      | 1376.5              | 11.0                  | 38.3                 | -7.8                 |

Supplementary Information

**Table S2.** Fungal:Bacterial ratios (F:B) or Bacterial:Fungal ratios (B:F) and their standard errors averaged across four samples per site for inoculum leaf litter and five samples per site for transplanted litterbags at 6 and 12 months. Both bacteria and fungi are estimated as g C/g dry leaf litter.

| Site      | Leaf litter type | F:B   | SE    | B:F    | SE    |
|-----------|------------------|-------|-------|--------|-------|
| Desert    | Inoculum         | 0.351 | 0.128 | 2.849  | 1.04  |
| Scrubland | Inoculum         | 0.724 | 0.255 | 1.382  | 0.49  |
| Grassland | Inoculum         | 0.147 | NA    | 6.812  | NA    |
| Pine-Oak  | Inoculum         | 0.158 | 0.054 | 6.330  | 2.15  |
| Subalpine | Inoculum         | 0.163 | 0.025 | 6.121  | 0.95  |
| Desert    | Litterbags 6 mo  | 0.372 | 0.134 | 2.686  | 0.96  |
| Scrubland | Litterbags 6 mo  | 0.072 | 0.015 | 13.793 | 2.95  |
| Grassland | Litterbags 6 mo  | 0.053 | 0.008 | 18.902 | 2.89  |
| Pine-Oak  | Litterbags 6 mo  | 0.040 | 0.006 | 24.889 | 3.47  |
| Subalpine | Litterbags 6 mo  | 0.057 | 0.008 | 17.462 | 2.44  |
| Desert    | Litterbags 12 mo | 0.105 | 0.023 | 9.512  | 2.09  |
| Scrubland | Litterbags 12 mo | 0.023 | 0.003 | 43.101 | 5.53  |
| Grassland | Litterbags 12 mo | 0.131 | 0.040 | 7.643  | 2.35  |
| Pine-Oak  | Litterbags 12 mo | 0.031 | 0.006 | 32.210 | 5.98  |
| Subalpine | Litterbags 12 mo | 0.012 | 0.002 | 83.933 | 15.40 |

Supplementary Information

**Table S3.** A) PERMANOVA results for the effects of site, date, and site\*date interaction on microbial community composition of both the inoculum and survey in-situ leaf litter for A) bacteria and B) fungi. In situ leaf litter was collected adjacent to each plot in September 2015 for initial use as the inoculum for the transplant experiment, and in situ litter collections continued at each sampling point on October 2015 (0 months), April 2016 (6 months), October 2016 (12 months), and April 2017 (18 months) to serve as a survey of the natural microbial community.

| A) Bacteria     |    |           |         |         |                |          |     |
|-----------------|----|-----------|---------|---------|----------------|----------|-----|
|                 | Df | SumsOfSqs | MeanSqs | F.Model | R <sup>2</sup> | Pr(>F)   |     |
| Site            | 4  | 10.5221   | 2.63053 | 43.612  | 0.66           | 1.00E-04 | *** |
| SampleDate      | 4  | 0.7527    | 0.18818 | 3.12    | 0.05           | 4.00E-04 | *** |
| Site:SampleDate | 13 | 1.7401    | 0.13385 | 2.219   | 0.11           | 1.00E-04 | *** |
| Residuals       | 47 | 2.8349    | 0.06032 |         | 0.18           |          |     |
| Total           | 68 | 15.8498   |         |         | 1.00           |          |     |
| B) Fungi        |    |           |         |         |                |          |     |
|                 | Df | SumsOfSqs | MeanSqs | F.Model | R <sup>2</sup> | Pr(>F)   |     |
| Site            | 4  | 19.606    | 4.9014  | 39.82   | 0.58           | 1.00E-04 | *** |
| SampleDate      | 4  | 1.27      | 0.3176  | 2.58    | 0.04           | 3.00E-04 | *** |
| Site:SampleDate | 16 | 4.355     | 0.2722  | 2.211   | 0.13           | 1.00E-04 | *** |
| Residuals       | 68 | 8.37      | 0.1231  |         | 0.25           |          |     |
| Total           | 92 | 33.601    |         |         | 1.00           |          |     |

Supplementary Information

**Table S4.** PERMANOVA results for the effects of site, inoculum, and site\*inoculum interaction on bacterial community composition in transplant litterbags at all three time points.

**6 months**

|               | Df | SumsOfSqs | MeanSqs | F.Model | R <sup>2</sup> | Pr(>F)   |     |
|---------------|----|-----------|---------|---------|----------------|----------|-----|
| Site          | 4  | 5.3289    | 1.33222 | 17.4236 | 0.34           | 1.00E-04 | *** |
| Inoculum      | 4  | 2.5453    | 0.63633 | 8.3224  | 0.16           | 1.00E-04 | *** |
| Site:Inoculum | 16 | 2.9225    | 0.18266 | 2.3889  | 0.19           | 1.00E-04 | *** |
| Residuals     | 61 | 4.6641    | 0.07646 |         | 0.30           |          |     |
| Total         | 85 | 15.4608   |         |         | 1.00           |          |     |

**12 months**

|               | Df | SumsOfSqs | MeanSqs | F.Model | R <sup>2</sup> | Pr(>F)   |     |
|---------------|----|-----------|---------|---------|----------------|----------|-----|
| Site          | 4  | 6.8983    | 1.72459 | 19.7618 | 0.36           | 1.00E-04 | *** |
| Inoculum      | 4  | 2.9448    | 0.7362  | 8.436   | 0.15           | 1.00E-04 | *** |
| Site:Inoculum | 16 | 3.216     | 0.201   | 2.3032  | 0.17           | 1.00E-04 | *** |
| Residuals     | 72 | 6.2834    | 0.08727 |         | 0.32           |          |     |
| Total         | 96 | 19.3425   |         |         | 1.00           |          |     |

**18 months**

|               | Df | SumsOfSqs | MeanSqs | F.Model | R <sup>2</sup> | Pr(>F)   |     |
|---------------|----|-----------|---------|---------|----------------|----------|-----|
| Site          | 4  | 8.8405    | 2.21013 | 28.6693 | 0.47           | 1.00E-04 | *** |
| Inoculum      | 4  | 1.9093    | 0.47732 | 6.1916  | 0.10           | 1.00E-04 | *** |
| Site:Inoculum | 16 | 2.6101    | 0.16313 | 2.1161  | 0.14           | 1.00E-04 | *** |
| Residuals     | 72 | 5.5505    | 0.07709 |         | 0.29           |          |     |
| Total         | 96 | 18.9104   |         |         | 1.00           |          |     |



Supplementary Information

**Table S5.** PERMANOVA results for the effects of site, inoculum, and site\*inoculum interaction on fungal community composition in transplant litterbags at all three time points.

**6 months**

|               | Df | SumsOfSqs | MeanSqs | F.Model | R <sup>2</sup> | Pr(>F)   |     |
|---------------|----|-----------|---------|---------|----------------|----------|-----|
| Site          | 4  | 3.6505    | 0.9126  | 16.292  | 0.14           | 1.00E-04 | *** |
| Inoculum      | 4  | 15.1216   | 3.7804  | 67.486  | 0.57           | 1.00E-04 | *** |
| Site:Inoculum | 16 | 3.8354    | 0.2397  | 4.279   | 0.15           | 1.00E-04 | *** |
| Residuals     | 68 | 3.8092    | 0.056   |         | 0.14           |          |     |
| Total         | 92 | 26.4167   |         |         | 1.00           |          |     |

**12 months**

|               | Df | SumsOfSqs | MeanSqs | F.Model | R <sup>2</sup> | Pr(>F)   |     |
|---------------|----|-----------|---------|---------|----------------|----------|-----|
| Site          | 4  | 3.8139    | 0.95347 | 10.747  | 0.15           | 1.00E-04 | *** |
| Inoculum      | 4  | 11.3907   | 2.84767 | 32.096  | 0.46           | 1.00E-04 | *** |
| Site:Inoculum | 16 | 4.123     | 0.25769 | 2.904   | 0.16           | 1.00E-04 | *** |
| Residuals     | 64 | 5.6782    | 0.08872 |         | 0.23           |          |     |
| Total         | 88 | 25.0058   |         |         | 1.00           |          |     |

**18 months**

|               | Df | SumsOfSqs | MeanSqs | F.Model | R <sup>2</sup> | Pr(>F)   |     |
|---------------|----|-----------|---------|---------|----------------|----------|-----|
| Site          | 4  | 5.111     | 1.27775 | 15.693  | 0.20           | 1.00E-04 | *** |
| Inoculum      | 4  | 10.498    | 2.62451 | 32.234  | 0.41           | 1.00E-04 | *** |
| Site:Inoculum | 16 | 4.5197    | 0.28248 | 3.469   | 0.18           | 1.00E-04 | *** |
| Residuals     | 65 | 5.2924    | 0.08142 |         | 0.21           |          |     |
| Total         | 89 | 25.4212   |         |         | 1.00           |          |     |

## Supplementary Information

**Table S6.** ANOVA results for the effects Site, Inoculum, and Site\*Inoculum interaction on leaf litter decomposition as percent mass loss for the three time points. Effect sizes listed as partial eta-squared. We then estimated the total variance explained by multiplying the partial eta-squared by the adjusted R<sup>2</sup> of the model and included that in Figure 3.

### 6 months

|               | Df | Sum Sq | Mean Sq | F value | P-value | Sig | partial eta-squared | Estimate of variance explained |
|---------------|----|--------|---------|---------|---------|-----|---------------------|--------------------------------|
| Site          | 4  | 4850   | 1212.4  | 52.465  | <2e-16  | *** | 0.74                | 0.51                           |
| Inoculum      | 4  | 86     | 21.4    | 0.925   | 0.454   |     | 0.05                | 0.03                           |
| Site:Inoculum | 16 | 619    | 38.7    | 1.675   | 0.0714  | .   | 0.27                | 0.19                           |
| Residuals     | 73 | 1687   | 23.1    |         |         |     |                     |                                |

F-statistic: 10.01 on 24 and 73 DF, p-value: 9.481e-15; Multiple R<sup>2</sup>: 0.767; Adjusted R<sup>2</sup>: 0.6904

### 12 months

|               | Df | Sum Sq | Mean Sq | F value | P-value  | Sig | partial eta-squared | Estimate of variance explained |
|---------------|----|--------|---------|---------|----------|-----|---------------------|--------------------------------|
| Site          | 4  | 3929   | 982.3   | 24.013  | 9.34E-13 | *** | 0.57                | 0.30                           |
| Inoculum      | 4  | 416    | 104.1   | 2.544   | 0.0465   | *   | 0.12                | 0.06                           |
| Site:Inoculum | 16 | 1273   | 79.6    | 1.945   | 0.029    | *   | 0.30                | 0.16                           |
| Residuals     | 74 | 3027   | 40.9    |         |          |     |                     |                                |

F-statistic: 5.723 on 24 and 74 DF, p-value: 3.186e-09; Multiple R<sup>2</sup>: 0.6499; Adjusted R<sup>2</sup>: 0.5363

### 18 months

|               | Df | Sum Sq | Mean Sq | F value | P-value | Sig | partial eta-squared | Estimate of variance explained |
|---------------|----|--------|---------|---------|---------|-----|---------------------|--------------------------------|
| Site          | 4  | 8266   | 2066.6  | 86.072  | <2e-16  | *** | 0.82                | 0.64                           |
| Inoculum      | 4  | 259    | 64.6    | 2.692   | 0.0375  | *   | 0.13                | 0.10                           |
| Site:Inoculum | 16 | 240    | 15      | 0.624   | 0.8548  |     | 0.12                | 0.09                           |
| Residuals     | 73 | 1753   | 24      |         |         |     |                     |                                |

F-statistic: 15.21 on 24 and 73 DF, p-value: < 2.2e-16; Multiple R<sup>2</sup>: 0.8333; Adjusted R<sup>2</sup>: 0.7786

Supplementary Information

**Table S7.** PERMANOVA results for the effects of site, inoculum, and site\*inoculum interaction on organic carbon litter chemistry (Euclidian distance matrix of lignin, cellulose, hemicellulose, crude protein, and structural carbohydrates).

|               | Df | SumsOfSqs | MeanSqs  | F.Model | R <sup>2</sup> | Pr(>F) |     |
|---------------|----|-----------|----------|---------|----------------|--------|-----|
| Site          | 4  | 0.12815   | 0.032037 | 36.362  | 0.53           | 0.0001 | *** |
| Inoculum      | 4  | 0.011907  | 0.002977 | 3.379   | 0.05           | 0.0034 | **  |
| Site:Inoculum | 16 | 0.038556  | 0.00241  | 2.735   | 0.16           | 0.0003 | *** |
| Residuals     | 72 | 0.063438  | 0.000881 |         | 0.26           |        |     |
| Total         | 96 | 0.242051  |          |         | 1.00           |        |     |

Supplementary Information

**Table S8.** Litter chemistry at 12 months site comparisons. SIMPER analysis showing percent contribution of the litter compounds to pairwise site comparisons from the PERMANOVA test (Table S7). P-value is significance of litter chemistry differences between the two sites.

|                     | Hemicellulose | Cellulose | Protein | Lignin | Structural<br>Carbohydrates | Corrected<br>P-value |
|---------------------|---------------|-----------|---------|--------|-----------------------------|----------------------|
| Desert-Grassland    | 0.33          | 0.00      | 0.23    | 0.19   | 0                           | <b>0.001</b>         |
| Desert-Pine-Oak     | 0.29          | 0.00      | 0.20    | 0.25   | 0                           | <b>0.001</b>         |
| Desert-Scrubland    | 0.29          | 0.25      | 0.00    | 0.15   | 0.16                        | <b>0.004</b>         |
| Desert-Subalpine    | 0.24          | 0.22      | 0.19    | 0.21   | 0                           | <b>0.001</b>         |
| Grassland-Pine-Oak  | 0.32          | 0.20      | 0.20    | 0.00   | 0                           | <b>0.001</b>         |
| Grassland-Scrubland | 0.30          | 0.22      | 0.20    | 0.00   | 0                           | <b>0.001</b>         |
| Grassland-Subalpine | 0.30          | 0.21      | 0.23    | 0.00   | 0                           | <b>0.001</b>         |
| Pine-Oak-Scrubland  | 0.25          | 0.22      | 0.20    | 0.23   | 0                           | <b>0.001</b>         |
| Pine-Oak-Subalpine  | 0.23          | 0.26      | 0.24    | 0.00   | 0                           | <b>0.008</b>         |
| Scrubland-Subalpine | 0.23          | 0.23      | 0.21    | 0.19   | 0                           | 0.098                |

Supplementary Information

**Table S9.** ANOVA results for the effects of Site, Inoculum, and Site\*Inoculum interactions on A) bacterial cell abundance (cells/g dry leaf litter) across the three time points and B) fungal abundance (cm fungal hyphae/g dry leaf litter) in transplant litterbags across two time points (fungal abundance was not collected at 18 months). Bacterial and fungal abundance are square root transformed to improve normality. Effect sizes listed as partial eta-squared. We then estimated the total variance explained by multiplying the partial eta-squared by the adjusted R<sup>2</sup> of the model and included that in Figure 3.

A) Bacteria

**6 months**

|               | Df | Sum Sq   | Mean Sq  | F value | P-value | Sig | partial eta-squared | Estimate of variance explained |
|---------------|----|----------|----------|---------|---------|-----|---------------------|--------------------------------|
| Site          | 4  | 7.08E+10 | 1.77E+10 | 46.821  | <2e-16  | *** | 0.71                | 0.47                           |
| Inoculum      | 4  | 5.32E+09 | 1.33E+09 | 3.516   | 0.011   | *   | 0.16                | 0.11                           |
| Site:Inoculum | 16 | 4.92E+09 | 3.07E+08 | 0.813   | 0.667   | .   | 0.15                | 0.10                           |
| Residuals     | 74 | 2.80E+10 | 3.78E+08 |         |         |     |                     |                                |

F-statistic: 8.931 on 24 and 74 DF, p-value: 1.339e-13; Multiple R<sup>2</sup>: 0.7434; Adjusted R<sup>2</sup>: 0.6601

**12 months**

|               | Df | Sum Sq   | Mean Sq  | F value | P-value | Sig | partial eta-squared | Estimate of variance explained |
|---------------|----|----------|----------|---------|---------|-----|---------------------|--------------------------------|
| Site          | 4  | 6.55E+10 | 1.64E+10 | 36.413  | <2e-16  | *** | 0.66                | 0.40                           |
| Inoculum      | 4  | 8.17E+08 | 2.04E+08 | 0.454   | 0.769   | .   | 0.02                | 0.01                           |
| Site:Inoculum | 16 | 1.19E+10 | 7.42E+08 | 1.651   | 0.0766  | .   | 0.26                | 0.16                           |
| Residuals     | 74 | 3.33E+10 | 4.50E+08 |         |         |     |                     |                                |

F-statistic: 7.245 on 24 and 74 DF, p-value: 1.954e-11; Multiple R<sup>2</sup>: 0.7015; Adjusted R<sup>2</sup>: 0.6046

**18 months**

|               | Df | Sum Sq   | Mean Sq  | F value | P-value  | Sig | partial eta-squared | Estimate of variance explained |
|---------------|----|----------|----------|---------|----------|-----|---------------------|--------------------------------|
| Site          | 4  | 2.06E+10 | 5.15E+09 | 11.184  | 3.77E-07 | *** | 0.38                | 0.12                           |
| Inoculum      | 4  | 3.90E+09 | 9.76E+08 | 2.118   | 0.087    | .   | 0.10                | 0.03                           |
| Site:Inoculum | 16 | 7.99E+09 | 4.99E+08 | 1.084   | 0.385    | .   | 0.19                | 0.06                           |
| Residuals     | 74 | 3.41E+10 | 4.61E+08 |         |          |     |                     |                                |

F-statistic: 2.502 on 24 and 74 DF, p-value: 0.001409; Multiple R<sup>2</sup>: 0.448; Adjusted R<sup>2</sup>: 0.322

B) Fungi

**6 months**

|      | Df | Sum Sq | Mean Sq | F value | P-value | Sig | partial eta-squared | Estimate of variance explained |
|------|----|--------|---------|---------|---------|-----|---------------------|--------------------------------|
| Site | 4  | 1866   | 466.6   | 3.743   | 0.00801 | **  | 0.17                | 0.01                           |

## Supplementary Information

|               |    |      |       |       |         |      |      |
|---------------|----|------|-------|-------|---------|------|------|
| Inoculum      | 4  | 174  | 43.6  | 0.35  | 0.84351 | 0.02 | 0.00 |
| Site:Inoculum | 16 | 1450 | 90.6  | 0.727 | 0.75791 | 0.14 | 0.01 |
| Residuals     | 72 | 8975 | 124.7 |       |         |      |      |

F-statistic: 1.167 on 24 and 72 DF, p-value: 0.3011; Multiple R<sup>2</sup>: 0.28; Adjusted R<sup>2</sup>: 0.04

### 12 months

|               | Df | Sum Sq | Mean Sq | F value | P-value | Sig | partial eta-squared | Estimate of variance explained |
|---------------|----|--------|---------|---------|---------|-----|---------------------|--------------------------------|
| Site          | 4  | 1132   | 282.96  | 4.787   | 0.00    | **  | 0.26                | 0.05                           |
| Inoculum      | 4  | 351    | 87.74   | 1.484   | 0.22    |     | 0.10                | 0.02                           |
| Site:Inoculum | 16 | 1151   | 71.97   | 1.218   | 0.28    |     | 0.26                | 0.05                           |
| Residuals     | 56 | 3310   | 59.11   |         |         |     |                     |                                |

F-statistic: 1.857 on 24 and 56 DF, p-value: 0.02933; Multiple R<sup>2</sup>: 0.4432; Adjusted R<sup>2</sup>: 0.2045

Supplementary Information

**Table S10.** ANOVA results testing decomposition differences in control litterbags. These litterbags contained snipped (coarser than ground) in-situ litter with their natural microbial communities in either open (2mm window screen) or closed (0.22  $\mu\text{m}$  mesh) litterbags. ANOVA tested effect of site, litterbag material (open 2mm window screen vs closed 0.22  $\mu\text{m}$  mesh), and a litterbag material by site interaction on decomposition rates for each of the three timepoints. Effect sizes listed as partial eta-squared. We then estimated the total variance explained by multiplying the partial eta-squared by the adjusted  $R^2$  of the model.

**6 months**

|                         | Df | Sum Sq   | Mean Sq  | F value | P-value  | Sig | partial eta-squared | Estimate of variance explained |
|-------------------------|----|----------|----------|---------|----------|-----|---------------------|--------------------------------|
| Site                    | 4  | 1.75E+03 | 4.38E+02 | 48.068  | 1.26E-12 | *** | 0.87                | 0.72                           |
| litterbag material      | 1  | 7.65E+01 | 7.65E+01 | 8.406   | 0.00693  | **  | 0.22                | 0.18                           |
| litterbag material:site | 4  | 4.40E+01 | 1.10E+01 | 1.209   | 0.32763  |     | 0.14                | 0.12                           |
| Residuals               | 30 | 2.73E+02 | 9.10E+00 |         |          |     |                     |                                |

F-statistic: 22.84 on 9 and 30 DF, p-value: 4.406e-11; Multiple  $R^2$ : 0.8726; Adjusted  $R^2$ : 0.8344

**12 months**

|                         | Df | Sum Sq   | Mean Sq  | F value | P-value  | Sig | partial eta-squared | Estimate of variance explained |
|-------------------------|----|----------|----------|---------|----------|-----|---------------------|--------------------------------|
| Site                    | 4  | 1.22E+03 | 3.06E+02 | 8.986   | 7.56E-05 | *** | 0.55                | 0.25                           |
| litterbag material      | 1  | 1.20E+00 | 1.23E+00 | 0.036   | 0.85     |     | 0.00                | 0.00                           |
| litterbag material:site | 4  | 1.60E+02 | 4.01E+01 | 1.178   | 0.341    |     | 0.14                | 0.06                           |
| Residuals               | 29 | 9.87E+02 | 3.40E+01 |         |          |     |                     |                                |

F-statistic: 4.521 on 9 and 29 DF, p-value: 0.0008877; Multiple  $R^2$ : 0.5839; Adjusted  $R^2$ : 0.4547

**18 months**

|                         | Df | Sum Sq   | Mean Sq  | F value | P-value  | Sig | partial eta-squared | Estimate of variance explained |
|-------------------------|----|----------|----------|---------|----------|-----|---------------------|--------------------------------|
| Site                    | 4  | 7.05E+03 | 1.76E+03 | 109.936 | < 2e-16  | *** | 0.94                | 0.86                           |
| litterbag material      | 1  | 5.80E+01 | 5.76E+01 | 3.594   | 0.067646 | .   | 0.11                | 0.10                           |
| litterbag material:site | 4  | 4.95E+02 | 1.24E+02 | 7.729   | 0.000209 | *** | 0.51                | 0.47                           |
| Residuals               | 30 | 4.81E+02 | 1.60E+01 |         |          |     |                     |                                |

F-statistic: 52.7 on 9 and 30 DF, p-value: 6.174e-16; Multiple  $R^2$ : 0.9405; Adjusted  $R^2$ : 0.9227

## Supplemental Materials and Methods

*Temperature and precipitation:* Between April 2016-2017, two iButton temperature sensors (Mouser Electronics, Mansfield, TX, USA) were deployed at each site to record surface temperature at 4 hour intervals. Precipitation data relevant to each site was collected from nearby weather stations (Desert and Scrubland: Campground and Pinyon Crest weather stations, respectively, from this website: <http://deepcanyon.ucnrs.org/weather-data/>; Grassland: <https://www.ess.uci.edu/~california/>; Pine-Oak: <https://wrcc.dri.edu/cgi-bin/rawMAIN.pl?caucja>). Since there was no station directly next to the Subalpine site, the precipitation at this site is likely underestimated, and was averaged from three NOAA weather stations with heated gauges to account for snow (USC00045091; US1CARV0002; USC00044211) from: <https://www.ncdc.noaa.gov/cdo-web/datasets#GHCND>.

*Decomposition and litter chemistry:* Decomposition was measured as percent mass loss with mass of litter remaining in each bag converted to dry weight (by multiplying by the ratio of litter dry weight/litter wet weight) and divided by the initial mass (either 5g for transplant or 2g for open and closed in-situ bags). Oven-dried litter from transplant litterbags collected at 12 months was sent to Cumberland Valley Analytical Services ([www.foragelab.com](http://www.foragelab.com); Waynesboro, PA, USA) for near-IR spectroscopy to measure non-ash organic compounds including cellulose (acid detergent fiber – lignin), hemicellulose (neutral detergent fiber – acid detergent fiber), lignin, crude protein, and structural carbohydrates (non-fiber carbohydrates – non structural carbohydrates).

*Sample processing, DNA extraction, and genetic analysis:* All collected samples (litterbags and in-situ leaf litter) were stored at ambient temperature in an outside shade house on the UC Irvine campus and processed in the laboratory within two days of sampling. Bags were destructively sampled for DNA, mass loss, litter chemistry, and bacterial and fungal abundance. DNA was extracted (from 0.05g litter sample stored at -80 °C) using the FastDNA Spin Kit for Soil (MP Biomedicals, Santa Ana, CA, USA) following the manual with the modification of adding three freeze/thaw cycles (30s in liquid Nitrogen followed by 3-5 min in 60°C water bath) prior to bead beating step to improve cell lysis. DNA extracts were then frozen (-20 °C) until processing for genetic analysis as previously described (1). Briefly, bacterial community composition was characterized using the V4 region of the 16S ribosomal RNA (rRNA) gene using the 515F-926R primer pair and fungal composition was characterized using the ITS2 region of the Internal Transcribed Spacer (ITS) using the ITS9f-ITS4 primer combination. Purified libraries were sequenced in six separate Illumina MiSeq PE runs (2 x 250 bp) at the DNA Technologies Core, UC Davis Genome Center, Davis, CA, USA. Sequences were submitted to the National Center for Biotechnology Information Sequence Read Archive under accession number SRP150375.

*Bioinformatics processing:* All bioinformatics processing was conducted in UPARSE (2) version 10. Analyses were conducted by defining both 97% OTUs and exact sequence variants (AKA zOTUs), but since the results were nearly identical (1), we only present the analyses using 97% OTUs. Forward and reverse reads were quality checked with FastQC. In UPARSE primers were stripped and reads truncated, then forward and reverse reads were merged, then quality filtered and PhiX removed. OTUs were clustered at 97% sequence similarity removing singletons, and taxonomy was assigned in QIIME 1.9 (3) using the Greengenes database (4) and the UNITE



## Supplementary Information

database (5). For ITS2, only reads mapping to kingdom Fungi were retained, and for 16S, all reads mapping to Chloroplasts, mitochondria, or unclassified were removed.

*Microbial Abundance:* Bacterial cell densities were measured by flow cytometry and fungal hyphal lengths were measured on a microscope slide, then converted to bacterial and fungal biomass (mg C/g dry litter) for calculation of fungal:bacterial ratios as previously described (6). The formula employed to calculate bacterial biomass C was  $2.2 \times 10^{-13} \text{ g}/\mu\text{m}^3 \times 0.90432 \mu\text{m}^3 (4/3 \times \pi \times r^3 \text{ where } r = 0.6 \mu\text{m}) \times \text{flow cytometry cell count/g litter}$  (7). The formula employed to calculate fungal biomass C was  $(2.12264 \times 10^{-7} \text{ cm}^3) (\pi \times r^2 \text{ where } r = 0.00026 \text{ cm}) \times 1.1 \text{ g}/\text{cm}^3 \times 0.33 \times 0.4 \times \text{fungal length (cm/g litter)}$ (8).

### References:

1. Glassman SI & Martiny JBH (2018) Broudscale Ecological Patterns Are Robust to Use of Exact Sequence Variants versus Operational Taxonomic Units. *Mosphere* 3(4).
2. Edgar RC (2013) UPARSE: highly accurate OTU sequences from microbial amplicon reads. *Nat. Methods* 10(10):996-998.
3. Caporaso JG, *et al.* (2010) QIIME allows analysis of high-throughput community sequencing data. *Nat. Methods* 7(5):335-336.
4. DeSantis TZ, *et al.* (2006) Greengenes, a chimera-checked 16S rRNA gene database and workbench compatible with ARB. *Applied and Environmental Microbiology* 72(7):5069-5072.
5. Koljalg U, *et al.* (2005) UNITE: a database providing web-based methods for the molecular identification of ectomycorrhizal fungi. *New Phytologist* 166(3):1063-1068.
6. Baker NR, Khalili B, Martiny JBH, & Allison SD (2018) Microbial decomposers not constrained by climate history along a Mediterranean climate gradient in southern California. *Ecology* 99(6):1441-1452.
7. Bratbak G (1985) Bacterial biovolume and biomass estimations. *Applied and Environmental Microbiology* 49(6):1488-1493.
8. Paul EA & Clark FE (1996) Components of the soil biota. *Soil Microbiology and biochemistry*, (Academic Press, San Diego).
